# Supplementary material for: Analysis of impacts of exogenous pollutant bisphenol-A penetration on soybeans roots and their biological growth
Source: Royal Society of Chemistry journal article supplement (doi:10.1039/d2ra08090g), 2023-01-01
Supplement: d2ra08090g1.pdf [file d2ra08090g1.pdf]

**Analysis of impacts of exogenous pollutant bisphenol-A penetration on soybeans roots  
and its biological growth**

Eujung Kim <sup>a</sup>, Minjung Song <sup>a</sup>, Adam Gopal Ramu <sup>a</sup>, Dongjin Choi <sup>a\*</sup>

*<sup>a</sup> Department of Materials Science and Engineering, Hongik University, 2639-Sejong-ro,  
Jochiwon-eup, Sejong-city, 30016, Republic of Korea.*

**\*Corresponding author Email address:** [djchoi@hongik.ac.kr](mailto:djchoi@hongik.ac.kr) (Dongjin Choi)

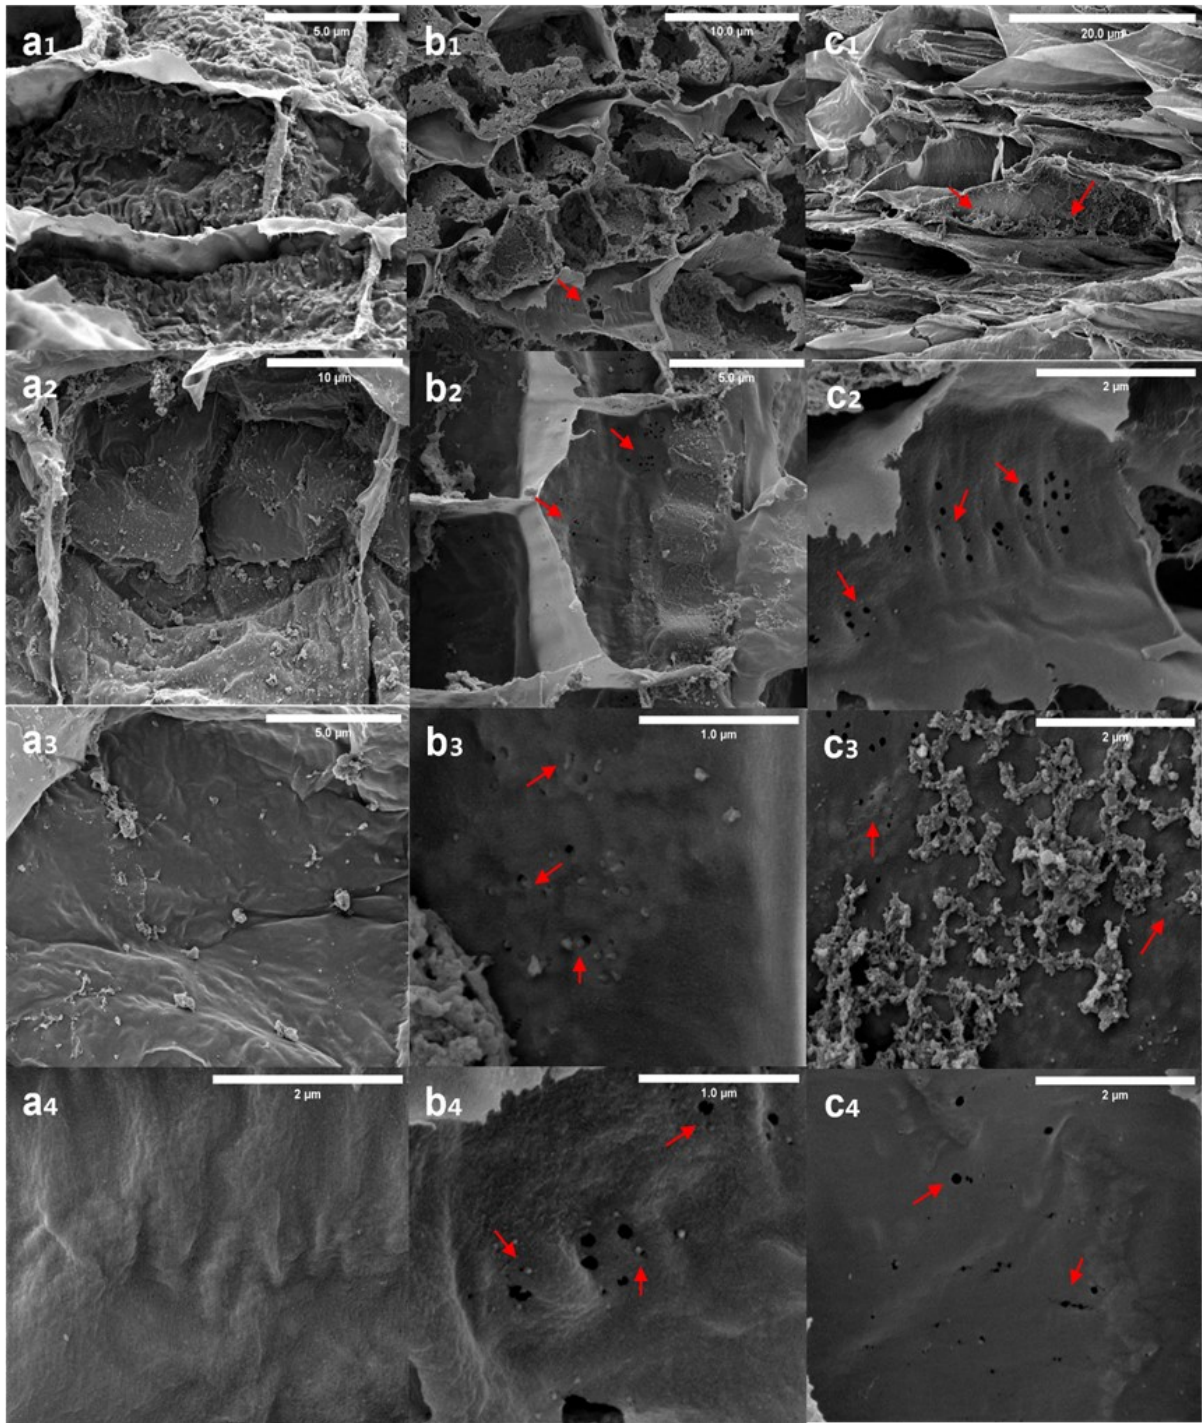

**Fig. SI. 1.** Ultrastructural changes in the root tissue of soybean seedlings exposed to 50 mg/L BPA for 28 days. (a<sub>1</sub>-a<sub>4</sub>) Control, (b<sub>1</sub>-b<sub>4</sub>), and (c<sub>1</sub>-c<sub>4</sub>) are BPA exposed samples.

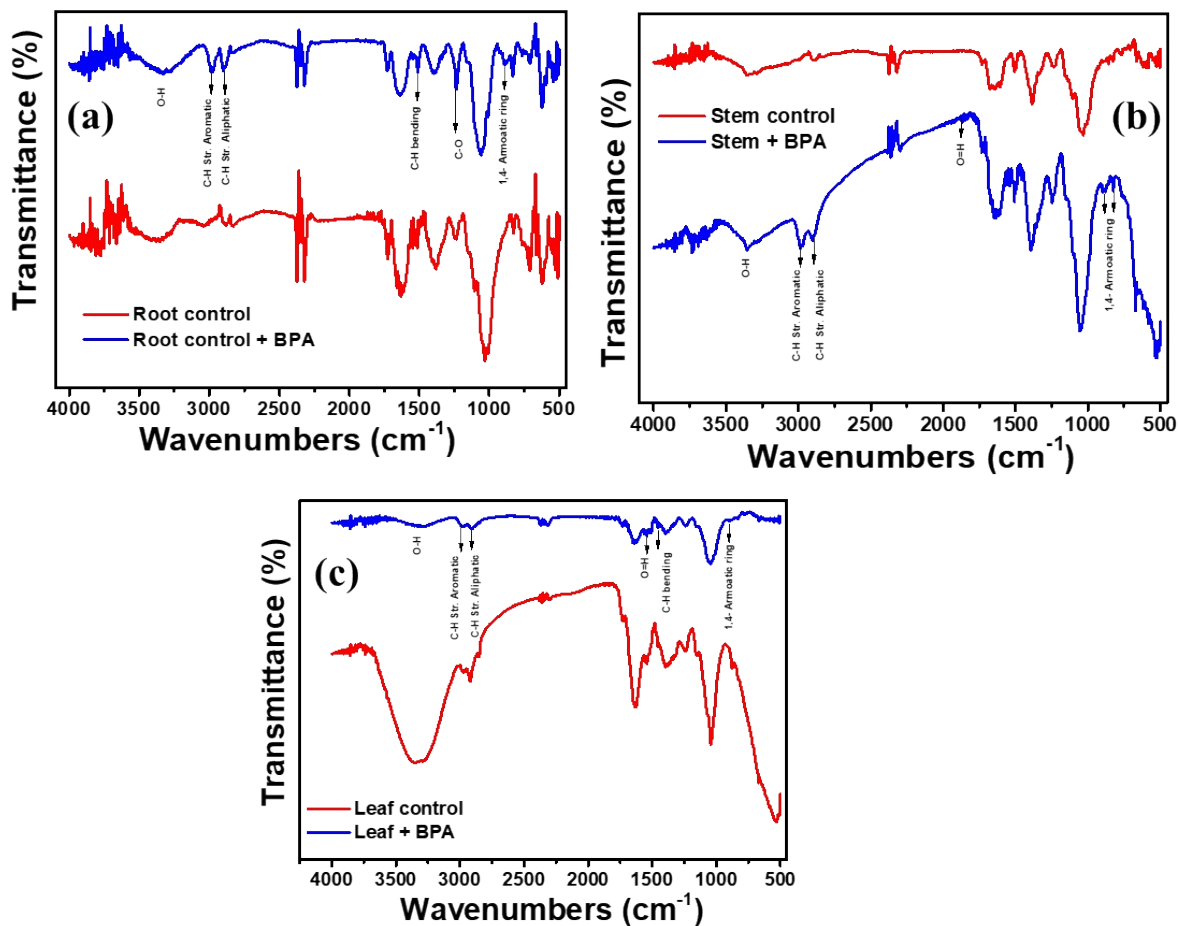

**Fig. SI. 2.** Detailed FTIR spectra comparison of (a) root (b) stem and (c) leaf of soybean seedlings exposed to 50 mg/L BPA for 28 days.

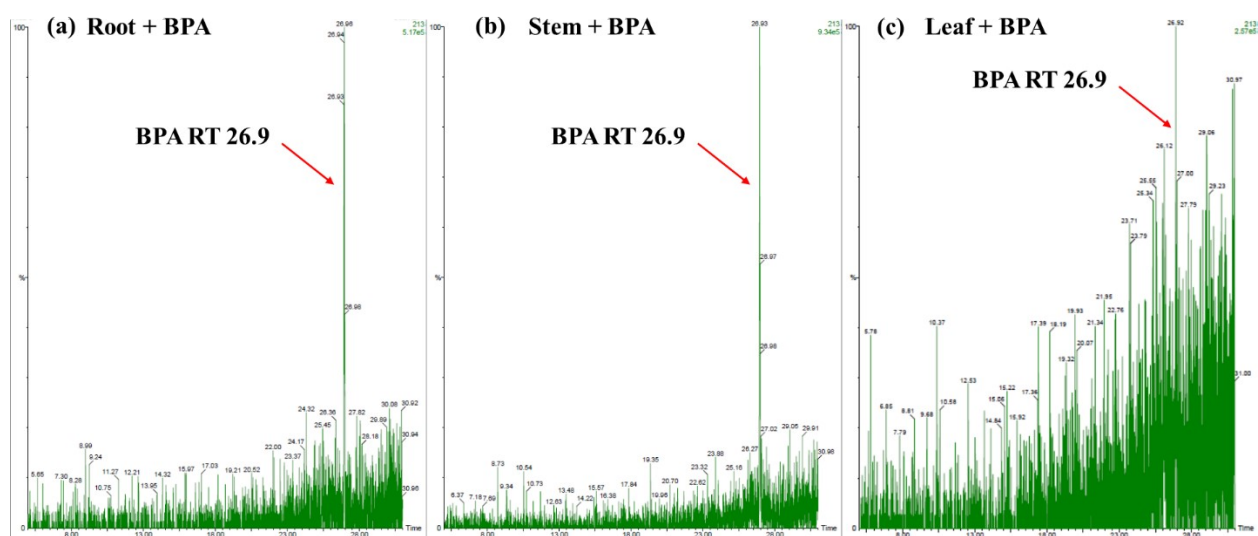

**Fig. SI. 3.** GC-MS spectra of (a) root (b) stem and (c) leaf of soybean seedlings exposed to 50 mg/L BPA for 28 days.

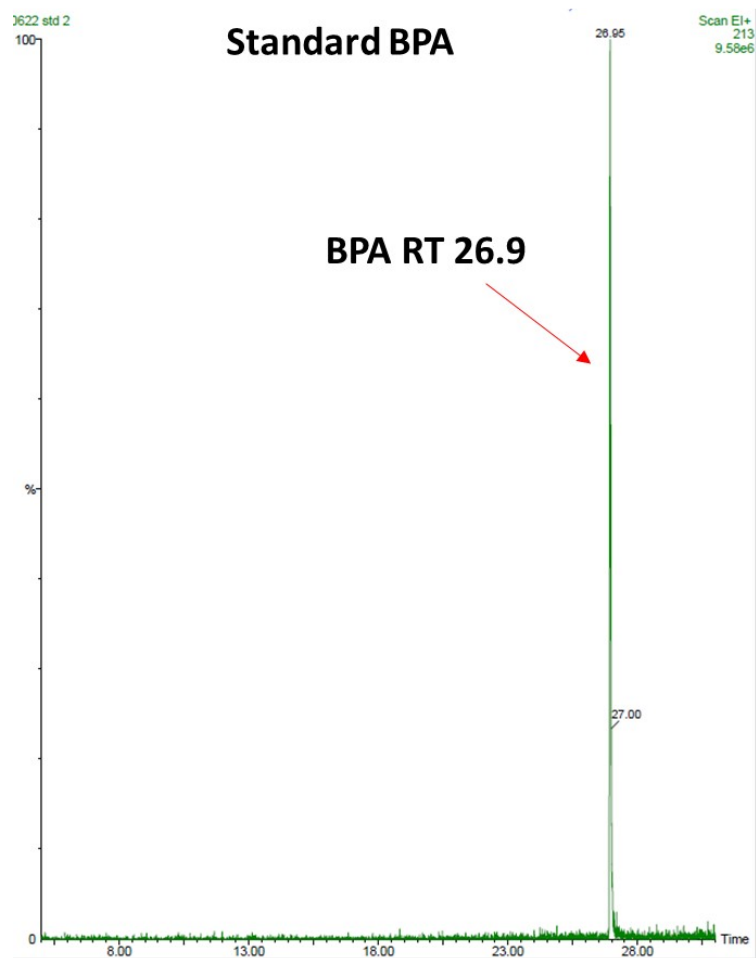

**Fig. SI. 4.** GC-MS spectra of standard BPA solution.

**Table. SI. 1.** Mass spectra fragments of standard BPA solution.

| Analyte | Precursor ion (m/z) | Confirmation                               |                       |
|---------|---------------------|--------------------------------------------|-----------------------|
|         |                     | Product ion (m/z)<br>$[C_{14}H_{13}O_2]^+$ | Collision energy (eV) |
| BPA     | 228.29              | 213                                        | 70                    |
